# Supplementary material for: Familial Risks for Liver, Gallbladder and Bile Duct Cancers and for Their Risk Factors in Sweden, a Low-Incidence Country
Source: MDPI journal article supplement (doi:10.3390/cancers14081938), 2022-04-12
Supplement: s1 [file s1]

## **Supplementary materials**

**Table S1.** ICD codes of comorbidities and patient numbers, 1964-2018.

|                                       | <b>ICD-7 (1964-1968)</b> | <b>ICD-8 (1969-1986)</b> | <b>ICD-9 (1987-1996)</b> | <b>ICD-10 (1997-)</b>                                | <b>No.</b> | <b>%</b> |
|---------------------------------------|--------------------------|--------------------------|--------------------------|------------------------------------------------------|------------|----------|
| Diabetes                              | 260                      | 250                      | 250                      | E10-E14                                              | 759476     | 26.0     |
| Autoimmune hepatitis                  |                          |                          |                          | K75.4                                                | 1888       | 0.1      |
| Primary biliary cirrhosis             | -                        | -                        | 571G                     | K74.3                                                | 3415       | 0.1      |
| Hepatitis B virus                     | -                        | 070.2, 070.3             | 070C-D                   | B18.0, B18.1                                         | 13543      | 0.5      |
| Hepatitis C virus                     | -                        |                          |                          | B17.1, B18.2                                         | 22350      | 0.8      |
| Gallstone disease                     | 584, 585                 | 574, 575                 | 574, 575                 | K80, K81                                             | 473657     | 16.2     |
| Obesity                               | 287                      | 277.99                   | 278A                     | E65-E68                                              | 201353     | 6.9      |
| Alcohol related disease               | 307, 322, 581 (ex 581.0) | 291, 303, 571 (ex 571.8) | 291, 303, 571A-D         | F10, K70                                             | 418604     | 14.3     |
| Non-alcohol related disease           | 581.0                    | 571.8                    | 571F, 571X               | K75.8, K76.0                                         | 6922       | 0.2      |
| Other hepatitis                       | 092, 580                 | 570                      | 570, 571E                | B17.8, B17.9, B18.8, B18.9, B94.2,<br>K73.0-9, K75.9 | 11442      | 0.4      |
| Infection of bile ducts.              | 586                      | 576                      | 576                      | K83                                                  | 51739      | 1.8      |
| Chronic obstructive pulmonary disease | 500-502                  | 490-493                  | 490-496                  | J40-J47                                              | 961024     | 32.9     |
| All of above                          |                          |                          |                          |                                                      | 2925413    | 100.0    |

**Table S2. Study population and number of case of hepatobiliary cancer with and without family history of hepatobiliary cancer, 1958-2018**

|                                                    | With family history of<br>hepatobiliary cancer |       | Non family history of<br>hepatobiliary cancer |       |
|----------------------------------------------------|------------------------------------------------|-------|-----------------------------------------------|-------|
|                                                    | No.                                            | %     | No.                                           | %     |
| <b>Population (N=9338882)</b>                      | 94208                                          | 100.0 | 9244674                                       | 100.0 |
| Men (N=4792416)                                    | 48158                                          | 51.1  | 4744258                                       | 51.3  |
| Women (n=4546466)                                  | 46050                                          | 48.9  | 4500416                                       | 48.7  |
| <b>Total case of hepatobiliary cancer</b>          |                                                |       |                                               |       |
| N. of case (N=8862) (% of all cases)               | 304                                            | 3.4   | 8558                                          | 96.6  |
| Mean age at diagnosis ( $\pm$ SD)                  | 63.9 $\pm$ 10.2                                |       | 61.7 $\pm$ 13.9                               |       |
| Incidence rate (per 100 000 person years)*, 95% CI | 13.0, 11.6-14.5                                |       | 9.4, 9.2-9.6                                  |       |
| <b>Men</b>                                         |                                                |       |                                               |       |
| N. of case (N=5127)                                | 168                                            | 55.3  | 4959                                          | 57.9  |
| Mean age at diagnosis ( $\pm$ SD)                  | 63.6 $\pm$ 10.3                                |       | 61.4 $\pm$ 13.8                               |       |
| Incidence rate (per 100 000 person years)*, 95% CI | 14.3, 12.1-16.5                                |       | 10.8, 10.5-11.1                               |       |
| <b>Women</b>                                       |                                                |       |                                               |       |
| N. of case (N=3735)                                | 136                                            | 44.7  | 3599                                          | 42.1  |
| Mean age at diagnosis ( $\pm$ SD)                  | 64.4 $\pm$ 10.2                                |       | 62.1 $\pm$ 14.1                               |       |
| Incidence rate (per 100 000 person years)*, 95% CI | 11.8, 9.8-13.8                                 |       | 8.1, 7.8-8.3                                  |       |
| <b>Subtypes of hepatobiliary cancer (N=8862)</b>   | 304                                            | 100.0 | 8558                                          | 100.0 |
| HCC (N=5315)                                       | 189                                            | 62.2  | 5126                                          | 59.9  |
| Gall bladder (N=1878)                              | 76                                             | 25.0  | 1802                                          | 21.1  |
| Extrahepatic bile ducts (N=1172)                   | 29                                             | 9.5   | 1143                                          | 13.4  |
| Ampulla of Vater (N=497)                           | 10                                             | 3.3   | 487                                           | 5.7   |

\*: Adjusted for European standardized population;

CI: Confidence interval; ICD: International classification of diseases.

**Table S3. Familial risks of concordant hepatobiliary cancer in men and women**

| Hepatobiliary cancer in family | HCC |             |             |             | Gall bladder |             |             |             | Extrahepatic bile ducts |      |        |       | Ampulla of vater |      |        |       |
|--------------------------------|-----|-------------|-------------|-------------|--------------|-------------|-------------|-------------|-------------------------|------|--------|-------|------------------|------|--------|-------|
|                                | O   | SIR         | 95% CI      |             | O            | SIR         | 95% CI      |             | O                       | SIR  | 95% CI |       | O                | SIR  | 95% CI |       |
| <b>Men</b>                     |     |             |             |             |              |             |             |             |                         |      |        |       |                  |      |        |       |
| HCC                            | 88  | <b>2.73</b> | <b>2.19</b> | <b>3.36</b> | 7            | 1.65        | 0.65        | 3.41        | 4                       | 0.68 | 0.18   | 1.76  | 3                | 1.24 | 0.23   | 3.68  |
| Gall bladder                   | 30  | 1.14        | 0.77        | 1.63        | 10           | <b>2.75</b> | <b>1.31</b> | <b>5.07</b> | 6                       | 1.19 | 0.43   | 2.60  | 2                | 0.96 | 0.09   | 3.55  |
| Extrahepatic bile ducts        | 7   | 0.82        | 0.33        | 1.71        | 2            | 1.73        | 0.16        | 6.36        | 2                       | 1.26 | 0.12   | 4.62  | 2                | 3.07 | 0.29   | 11.27 |
| Ampulla of Vater               | 5   | 1.37        | 0.43        | 3.21        | 0            |             |             |             | 0                       |      |        |       | 0                |      |        |       |
| All                            | 130 | <b>1.84</b> | <b>1.54</b> | <b>2.18</b> | 19           | <b>1.99</b> | <b>1.20</b> | <b>3.12</b> | 12                      | 0.91 | 0.47   | 1.60  | 7                | 1.29 | 0.51   | 2.68  |
| <b>Women</b>                   |     |             |             |             |              |             |             |             |                         |      |        |       |                  |      |        |       |
| HCC                            | 34  | <b>2.32</b> | <b>1.60</b> | <b>3.24</b> | 17           | 1.36        | 0.79        | 2.18        | 6                       | 1.21 | 0.44   | 2.65  | 3                | 1.56 | 0.29   | 4.62  |
| Gall bladder                   | 20  | <b>1.73</b> | <b>1.06</b> | <b>2.68</b> | 29           | <b>2.76</b> | <b>1.85</b> | <b>3.97</b> | 6                       | 1.44 | 0.52   | 3.16  | 0                |      |        |       |
| Extrahepatic bile ducts        | 3   | 0.79        | 0.15        | 2.33        | 11           | <b>3.23</b> | <b>1.60</b> | <b>5.80</b> | 4                       | 2.97 | 0.77   | 7.68  | 0                |      |        |       |
| Ampulla of Vater               | 2   | 1.25        | 0.12        | 4.58        | 0            |             |             |             | 1                       | 1.81 | 0.00   | 10.36 | 0                |      |        |       |
| All                            | 59  | <b>1.86</b> | <b>1.42</b> | <b>2.41</b> | 57           | <b>2.05</b> | <b>1.55</b> | <b>2.66</b> | 17                      | 1.54 | 0.90   | 2.48  | 3                | 0.71 | 0.13   | 2.10  |

O=Observed; SIR=Standardized incidence ratio; CI=Confidence intervals.

Bold types: 95% CI does not include 1.00.

**Table S4. Familial risks of hepatobiliary cancer of family members with any cancer in men and women**

| Cancer in family | HCC  |             |             |             | Gall bladder |             |             |             | Extrahepatic bile ducts |             |             |             | Ampulla of Vater |             |             |             |
|------------------|------|-------------|-------------|-------------|--------------|-------------|-------------|-------------|-------------------------|-------------|-------------|-------------|------------------|-------------|-------------|-------------|
|                  | O    | SIR         | 95% CI      |             | O            | SIR         | 95% CI      |             | O                       | SIR         | 95% CI      |             | O                | SIR         | 95% CI      |             |
| <b>Men</b>       |      |             |             |             |              |             |             |             |                         |             |             |             |                  |             |             |             |
| Pancreas         | 81   | 1.12        | 0.89        | 1.39        | 13           | 1.33        | 0.71        | 2.28        | 30                      | <b>2.20</b> | <b>1.48</b> | <b>3.15</b> | 9                | 1.61        | 0.73        | 3.07        |
| Colon            | 205  | 0.94        | 0.82        | 1.08        | 31           | 1.08        | 0.73        | 1.53        | 51                      | 1.26        | 0.94        | 1.66        | 27               | <b>1.61</b> | <b>1.06</b> | <b>2.35</b> |
| Lung             | 268  | <b>1.38</b> | <b>1.22</b> | <b>1.55</b> | 37           | <b>1.48</b> | <b>1.04</b> | <b>2.04</b> | 31                      | 0.89        | 0.60        | 1.26        | 20               | 1.40        | 0.85        | 2.16        |
| Hepatobiliary    | 130  | <b>1.84</b> | <b>1.54</b> | <b>2.18</b> | 19           | <b>1.99</b> | <b>1.20</b> | <b>3.12</b> | 12                      | 0.91        | 0.47        | 1.60        | 7                | 1.29        | 0.51        | 2.68        |
| Breast           | 287  | 0.95        | 0.84        | 1.07        | 49           | 1.24        | 0.91        | 1.63        | 50                      | 0.91        | 0.68        | 1.20        | 33               | <b>1.45</b> | <b>1.00</b> | <b>2.04</b> |
| Cervix           | 43   | 1.12        | 0.81        | 1.51        | 5            | 1.03        | 0.32        | 2.41        | 4                       | 0.59        | 0.15        | 1.52        | 4                | 1.44        | 0.37        | 3.72        |
| Melanoma         | 59   | 1.01        | 0.77        | 1.31        | 8            | 1.07        | 0.46        | 2.12        | 19                      | <b>1.85</b> | <b>1.11</b> | <b>2.90</b> | 4                | 0.95        | 0.25        | 2.45        |
| Nervous system   | 42   | 0.94        | 0.68        | 1.27        | 6            | 1.03        | 0.37        | 2.26        | 9                       | 1.12        | 0.51        | 2.14        | 8                | <b>2.45</b> | <b>1.05</b> | <b>4.85</b> |
| All              | 2344 | <b>1.04</b> | <b>1.00</b> | <b>1.08</b> | 369          | <b>1.24</b> | <b>1.12</b> | <b>1.37</b> | 407                     | 0.98        | 0.89        | 1.09        | 196              | <b>1.15</b> | <b>1.00</b> | <b>1.32</b> |
| <b>Women</b>     |      |             |             |             |              |             |             |             |                         |             |             |             |                  |             |             |             |
| Pancreas         | 39   | 1.20        | 0.85        | 1.64        | 33           | 1.17        | 0.80        | 1.64        | 11                      | 0.98        | 0.49        | 1.76        | 9                | 2.05        | 0.93        | 3.90        |
| Colon            | 95   | 0.98        | 0.79        | 1.20        | 72           | 0.86        | 0.67        | 1.09        | 43                      | 1.30        | 0.94        | 1.75        | 21               | 1.59        | 0.98        | 2.44        |
| Lung             | 116  | <b>1.33</b> | <b>1.10</b> | <b>1.60</b> | 65           | 0.89        | 0.69        | 1.14        | 36                      | 1.26        | 0.88        | 1.74        | 9                | 0.78        | 0.36        | 1.49        |
| Hepatobiliary    | 59   | <b>1.86</b> | <b>1.42</b> | <b>2.41</b> | 57           | <b>2.05</b> | <b>1.55</b> | <b>2.66</b> | 17                      | 1.54        | 0.90        | 2.48        | 3                | 0.71        | 0.13        | 2.10        |
| Breast           | 108  | 0.80        | 0.65        | 0.96        | 109          | 0.97        | 0.80        | 1.17        | 47                      | 1.06        | 0.78        | 1.41        | 14               | 0.76        | 0.42        | 1.29        |
| Cervix           | 28   | <b>1.61</b> | <b>1.07</b> | <b>2.33</b> | 13           | 0.91        | 0.48        | 1.56        | 3                       | 0.54        | 0.10        | 1.59        | 3                | 1.35        | 0.26        | 4.01        |
| Melanoma         | 25   | 0.93        | 0.60        | 1.37        | 25           | 1.20        | 0.78        | 1.78        | 9                       | 1.10        | 0.50        | 2.09        | 4                | 1.11        | 0.29        | 2.88        |
| Nervous system   | 24   | 1.20        | 0.77        | 1.79        | 18           | 1.12        | 0.66        | 1.78        | 9                       | 1.42        | 0.64        | 2.71        | 5                | 1.90        | 0.60        | 4.46        |
| All              | 1033 | 1.02        | 0.96        | 1.09        | 875          | 1.03        | 0.96        | 1.10        | 346                     | 1.03        | 0.92        | 1.14        | 134              | 0.99        | 0.83        | 1.17        |

O=Observed; SIR=Standardized incidence ratio; CI=Confidence intervals.

Bold types: 95% CI does not include 1.00.
